# Supplementary material for: High-efficiency green catalytic conversion for waste CS2 by non-noble metal cage-based MOFs: an access pathway to high-value thiazolidine-2-thione
Source: Royal Society of Chemistry journal article supplement (doi:10.1039/d4gc04541f), 2024-11-12
Supplement: d4gc04541f1.pdf [file d4gc04541f1.pdf]

## Supporting Information

### **High-efficient green catalytic conversion for waste CS<sub>2</sub> by non-noble metal cage-based MOFs: an access to high-valued thiazolidine-2-thione**

Wenyu Ding,<sup>‡</sup> Xinyu Tang,<sup>‡</sup> Sheng Jin, Zhao Li, Dongwei Xu, Xiaomin Kang\* and Zhiliang Liu\*

*Inner Mongolia Key Laboratory of Chemistry and Physics of Rare Earth Materials, College of Chemistry and Chemical Engineering, Inner Mongolia University, Hohhot, 010021, PR China.*

E-mail: [kangxm@imu.edu.cn](mailto:kangxm@imu.edu.cn), [cezlliu@imu.edu.cn](mailto:cezlliu@imu.edu.cn)

<sup>‡</sup> These authors contributed equally to this work.



## Table of Contents

**Table S1.** Crystal data and structure refinement for compound **1**.

**Table S2.** Bond lengths (Å) and bond angles (°) for compound **1**.

**Figure S1.** Image of as-synthesized compound **1**.

**Figure S2.** SEM images of compound **1**.

**Figure S3.** (a) The coordination environment of compound **1**; (b) The **pacs** topology of compound **1**.

**Figure S4.** XPS spectra of **1**: a) XPS survey spectrum; b) Co 2p XPS spectrum.

**Figure S5.** FT-IR spectra of compound **1** and ligands.

**Figure S6.** PXRD pattern of compound **1**.

**Figure S7.** Thermogravimetric analysis of compound **1**.

**Figure S8.** The PXRD patterns of the compound **1** after immersing in various organic solvents.

**Figure S9.** The N<sub>2</sub> adsorption of compound **1** (77 K).

**Figure S10.** The adsorption average pore diameter of compound **1**.

**Figure S11.** Catalyst filtration test for the cycloaddition of aziridines and CS<sub>2</sub>.

**Figure S12.** TOF values of different catalysts for the cycloaddition of CS<sub>2</sub> with 1-ethyl-2-phenylaziridine.

**Figure S13.** The three-dimensional size of 1-ethyl-2-phenylaziridine is  $10.2 \times 7.2 \times 6.1 \text{ \AA}^3$ , and the three-dimensional size of 3-ethyl-5-phenylthiazolidine-2-thione is  $12.7 \times 7.0 \times 6.0 \text{ \AA}^3$ .

**Figure S14.** The three-dimensional size of 1-propyl-2-phenylaziridine is  $11.0 \times 8.1 \times 5.9 \text{ \AA}^3$ , and the three-dimensional size of 3-propyl-5-phenylthiazolidine-2-thione is  $14.1 \times 7.3 \times 6.1 \text{ \AA}^3$ .

**Figure S15.** The three-dimensional size of 1-benzyl-2-phenylaziridine is  $13.7 \times 7.1 \times 7.0 \text{ \AA}^3$ , and the three-dimensional size of 3-benzyl-5-phenylthiazolidine-2-thione is  $14.2 \times 8.2 \times 7.2 \text{ \AA}^3$ .

**Figure S16.** The three-dimensional size of 1-isobutyl-2-phenylaziridine is  $11.0 \times 8.1 \times 6.0 \text{ \AA}^3$ , and the three-dimensional size of 3-isobutyl-5-phenylthiazolidine-2-thione is  $14.2 \times 7.3 \times 6.1 \text{ \AA}^3$ .

**Figure S17.** The three-dimensional size of 1-butyl-2-phenylaziridine is  $11.4 \times 8.6 \times 6.4 \text{ \AA}^3$ , and the three-dimensional size of 3-butyl-5-phenylthiazolidine-2-thione is  $15.4 \times 7.2 \times 6.0 \text{ \AA}^3$ .

**Figure S18.** The three-dimensional size of 1-methoxyethyl-2-phenylaziridine is  $11.2 \times 8.5 \times 6.4 \text{ \AA}^3$ , and the three-dimensional size of 3-methoxyethyl-5-phenylthiazolidine-2-thione is  $15.2 \times 7.1 \times 6.0 \text{ \AA}^3$ .

**Figure S19.** The three-dimensional size of 1-ethyl-2-(4-fluorophenyl)-aziridine is  $10.8 \times 7.2 \times 6.16 \text{ \AA}^3$ , and the three-dimensional size of 3-ethyl-5-(4-fluorophenyl)-thiazolidine-2-thione is  $13.4 \times 7.1 \times 5.9 \text{ \AA}^3$ .

**Figure S20.** The three-dimensional size of 1-ethyl-2-(4-chlorophenyl)-aziridine is  $11.5 \times 7.3 \times 6.2 \text{ \AA}^3$ , and the three-dimensional size of 3-ethyl-5-(4-chlorophenyl)-thiazolidine-2-thione is  $14.7 \times 7.1 \times 5.8 \text{ \AA}^3$ .

**Figure S21.** The three-dimensional size of 1-ethyl-2-(4-methyl)-aziridine is  $11.3 \times 7.2 \times 6.2 \text{ \AA}^3$ , and the three-dimensional size of 3-ethyl-5-p-tolylthiazolidine-2-thione is  $12.8 \times 7.1 \times 5.9 \text{ \AA}^3$ .

**Figure S22.** SEM images of compound **1** after 10 cycles of reaction.

**Figure S23.** The PXRD patterns of compound **1** after recycling.

**Table S3.** The ICP result of **1** after catalytic recycling (filter liquor).

**Figure S24.** The XPS analysis of compound **1** as a catalyst for the cycloaddition reaction of  $\text{CO}_2$  with 1-ethyl-2-phenylaziridine after ten catalysis recycling.

**Figure S25.** The FT-IR spectra of compound **1** and ten-times-reused **1**.

**Figure S26.**  $^1\text{H}$  NMR spectroscopy of digested compound **1** in the presence or absence of  $\text{CS}_2$  ( $\text{H}_2\text{O}/\text{DMSO} = 0.1/0.55 \text{ mL}$ ).

**Figure S27.** PXRD pattern of compound  $\text{Co(II/III)}$ .

**Table S4.** Comparison of yields of two isomeric  $[\text{Co}_3]$  cluster-based MOFs under optimized reaction conditions.

**Figure S28.** Recycling test of catalyst Co(II/III) in the CS<sub>2</sub> cycloaddition with 1-ethyl-2-phenylaziridine.

**Figure S29.** Catalyst filtration experiments of compound **1** and Co (II/III).

**Figure S30.** The DFT full optimized geometry of compound **1**.

**Table S1.** Crystal data and structure refinement for compound **1**.

| <b>1</b>                                             |                                                                                |
|------------------------------------------------------|--------------------------------------------------------------------------------|
| Empirical formula                                    | C <sub>61</sub> H <sub>74</sub> Co <sub>3</sub> N <sub>8</sub> O <sub>22</sub> |
| Formula weight                                       | 1448.04                                                                        |
| Temperature (K)                                      | 296.15                                                                         |
| Crystal system                                       | Hexagonal                                                                      |
| Space group                                          | P6 <sub>3</sub> /mmc                                                           |
| <i>a</i> (Å)                                         | 17.0841(8)                                                                     |
| <i>b</i> (Å)                                         | 17.0841(8)                                                                     |
| <i>c</i> (Å)                                         | 14.9800(9)                                                                     |
| $\alpha$ (°)                                         | 90                                                                             |
| $\beta$ (°)                                          | 90                                                                             |
| $\gamma$ (°)                                         | 120                                                                            |
| Volume (Å <sup>3</sup> )                             | 3786.4(4)                                                                      |
| <i>Z</i>                                             | 2                                                                              |
| $\rho_{calc}$ (g/m <sup>3</sup> )                    | 1.270                                                                          |
| $\mu$ (mm <sup>-1</sup> )                            | 0.721                                                                          |
| F (000)                                              | 1506.0                                                                         |
| <i>R</i> <sub>int</sub>                              | 0.0977                                                                         |
| GOF on <i>F</i> <sup>2</sup>                         | 1.023                                                                          |
| Final <i>R</i> indexes [ <i>I</i> >= 2σ( <i>I</i> )] | <i>R</i> <sub>1</sub> = 0.0379, <i>wR</i> <sub>2</sub> = 0.1001                |
| Final <i>R</i> indexes [all data]                    | <i>R</i> <sub>1</sub> = 0.0493, <i>wR</i> <sub>2</sub> = 0.1062                |
| Largest diff. peak and hole (e Å <sup>-3</sup> )     | 0.59/-0.41                                                                     |

**Table S2.** Bond lengths (Å) and bond angles (°) for compound **1**.

| <i>Bond distances</i> |            |                    |          |
|-----------------------|------------|--------------------|----------|
| Co1-O1                | 2.0330(4)  | C7-C8 <sup>4</sup> | 1.375(3) |
| Co1-O2 <sup>1</sup>   | 2.0723(13) | C7-C8              | 1.375(3) |
| Co1-O2 <sup>2</sup>   | 2.0723(13) | C3-C2              | 1.490(5) |
| Co1-O2                | 2.0722(13) | C3-C4 <sup>2</sup> | 1.369(4) |
| Co1-O2 <sup>3</sup>   | 2.0722(13) | C3-C4              | 1.369(4) |
| Co1-N1                | 2.163(3)   | C1-C2 <sup>5</sup> | 1.367(3) |
| O2-C6                 | 1.2347(18) | C1-C2              | 1.367(3) |
| N1-C5 <sup>2</sup>    | 1.328(4)   | C8-C8 <sup>6</sup> | 1.381(4) |
| N1-C5                 | 1.328(4)   | C5-C4              | 1.393(4) |
| C6-C7                 | 1.507(3)   |                    |          |

Symmetry transformations used to generate equivalent atoms:

<sup>1</sup>-1+Y-X,+Y,-1/2-Z; <sup>2</sup>-1+Y-X,+Y,+Z; <sup>3</sup>+X,+Y,-1/2-Z; <sup>4</sup>-Y,-X,+Z; <sup>5</sup>1-Y,2+X-Y,+Z; <sup>6</sup>-1+Y,1+X,-1-Z

| <i>Bond Angles</i>                    |           |                         |            |
|---------------------------------------|-----------|-------------------------|------------|
| O1-Co1-O2 <sup>1</sup>                | 92.43(4)  | C5-N1-Co1               | 122.09(18) |
| O1-Co1-O2                             | 92.43(4)  | C5 <sup>3</sup> -N1-Co1 | 122.09(18) |
| O1-Co1-O2 <sup>2</sup>                | 92.43(4)  | C5 <sup>3</sup> -N1-C5  | 115.8(4)   |
| O1-Co1-O2 <sup>3</sup>                | 92.43(4)  | O2-C6-O2 <sup>6</sup>   | 126.4(2)   |
| O1-Co1-N1                             | 180.00    | O2-C6-C7                | 116.79(12) |
| O2-Co1-O2 <sup>2</sup>                | 175.14(8) | O2 <sup>6</sup> -C6-C7  | 116.79(12) |
| O2-Co1-O2 <sup>3</sup>                | 90.30(11) | C8 <sup>6</sup> -C7-C6  | 120.98(13) |
| O2 <sup>1</sup> -Co1-O2 <sup>2</sup>  | 90.30(11) | C8-C7-C6                | 120.98(13) |
| O2 <sup>1</sup> -Co1-O2 <sup>3</sup>  | 175.14(8) | C8 <sup>6</sup> -C7-C8  | 118.0(3)   |
| O2 <sup>1</sup> -Co1-O2               | 89.50(11) | C4-C3-C2                | 121.43(19) |
| O2 <sup>2</sup> -Co1-O2 <sup>3</sup>  | 89.50(11) | C4 <sup>3</sup> -C3-C2  | 121.43(19) |
| O2-Co1-N1                             | 87.57(4)  | C4 <sup>3</sup> -C3-C4  | 117.1(4)   |
| O2 <sup>3</sup> -Co1-N1               | 87.57(4)  | C2-C1-C2 <sup>7</sup>   | 119.9(4)   |
| O2 <sup>2</sup> -Co1-N1               | 87.57(4)  | C1 <sup>8</sup> -C2-C3  | 119.9(4)   |
| O2 <sup>1</sup> -Co1-N1               | 87.57(4)  | C1-C2-C3                | 119.9(4)   |
| Co1 <sup>4</sup> -O1-Co1              | 120.0     | C1-C2-C1 <sup>8</sup>   | 120.1(4)   |
| Co1-O1-Co1 <sup>5</sup>               | 120.0     | C7-C8-C8 <sup>9</sup>   | 120.97(13) |
| Co1 <sup>4</sup> -O1-Co1 <sup>5</sup> | 120.0     | N1-C5-C4                | 123.9(3)   |

Symmetry transformations used to generate equivalent atoms:

$^1+x, +y, -1/2-z$ ;  $^2-1+y-x, +y, -1/2-z$ ;  $^3-1+y-x, +y, +z$ ;  $^4-1+y-x, -x, -1/2-z$ ;  $^5-y, 1+x-y, +z$ ;  $^6-y, -x, +z$ ;  $^7-1-y, 2+x-y, +z$ ;  $^8-1+y-x, 1-x, -1/2-z$ ;  $^9-1+y, 1+x, -1-z$

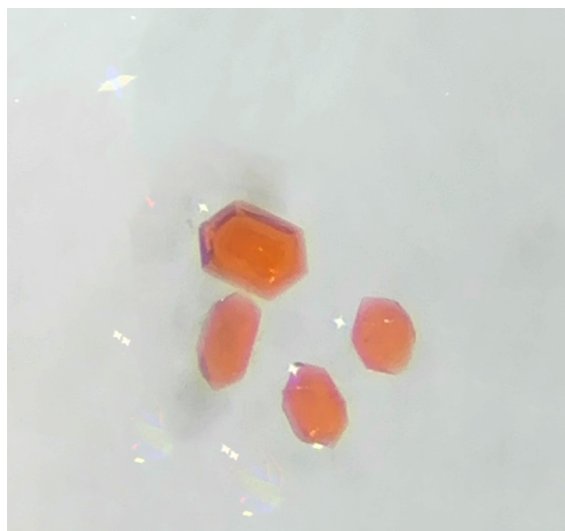

**Figure S1.** Image of as-synthesized compound 1.

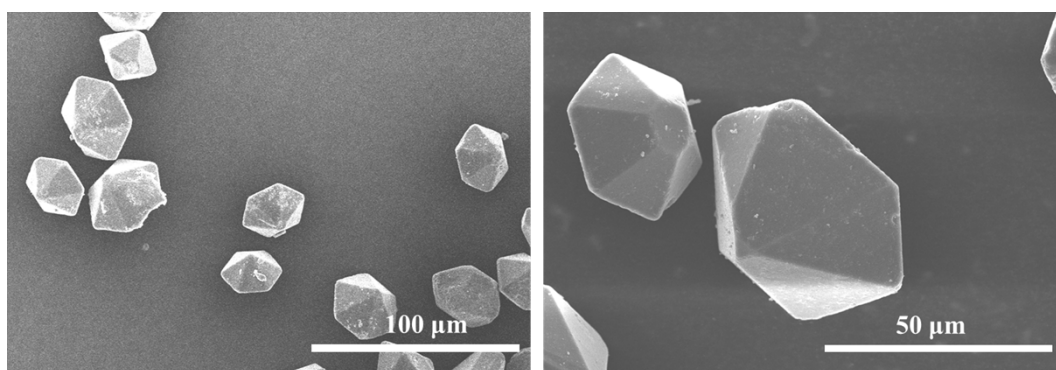

**Figure S2.** SEM images of compound 1.



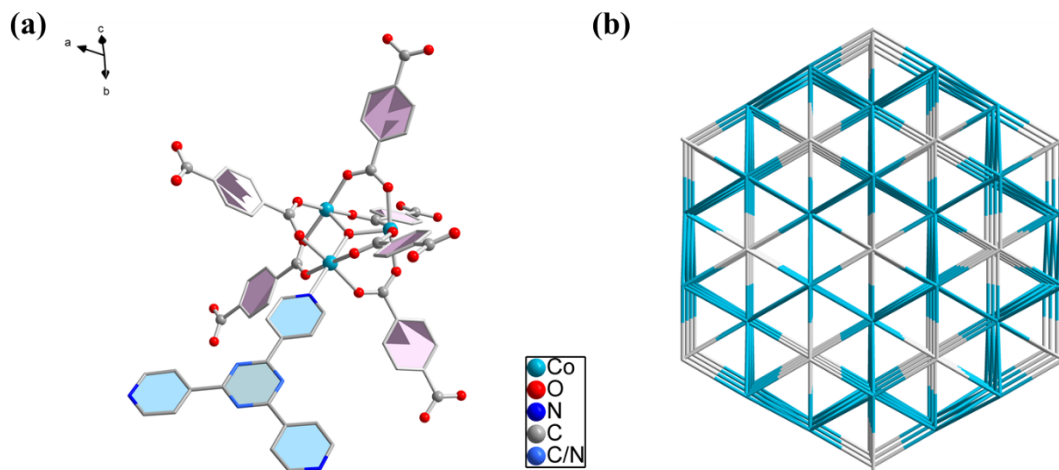

**Figure S3.** (a) The coordination environment of compound **1**; (b) The **pacs** topology of compound **1**.

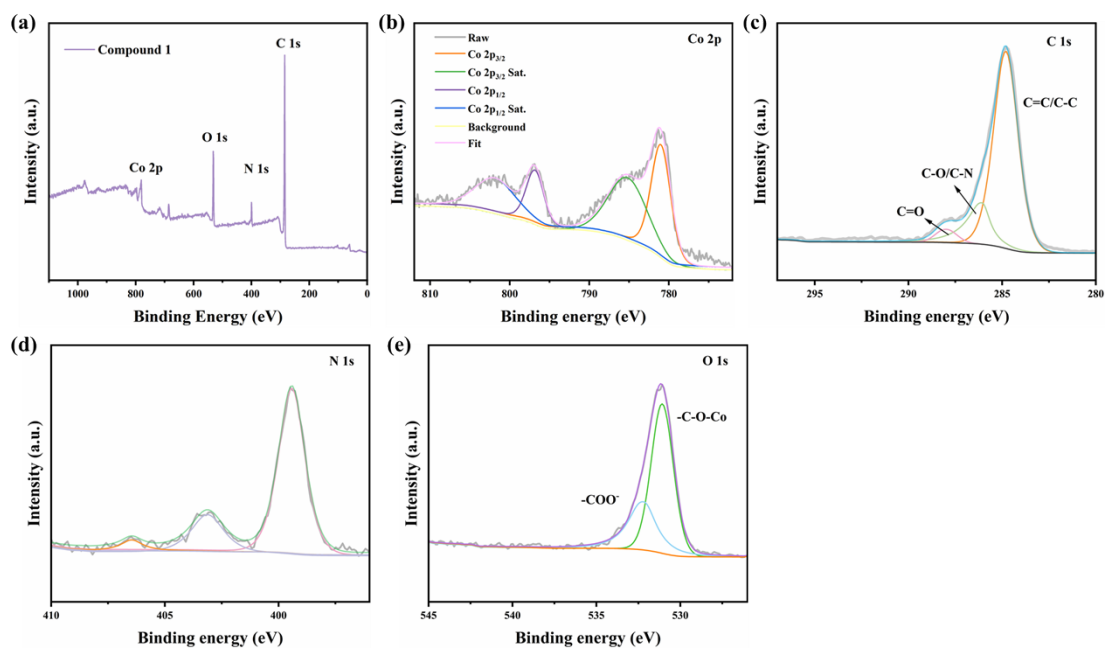

**Figure S4.** XPS spectra of **1**: a) XPS survey spectrum; b) Co 2p; c) C 1s; d) N 1s; e) O 1s.

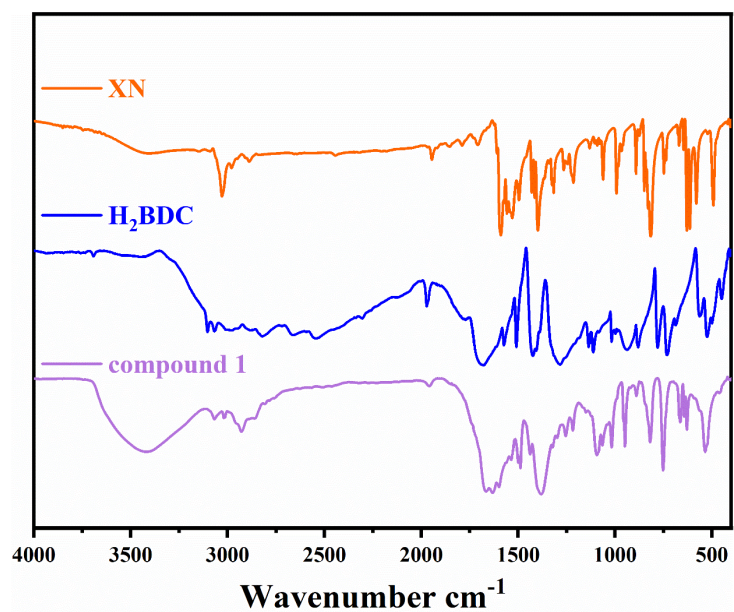

**Figure S5.** FT-IR spectra of compound **1** and ligands.

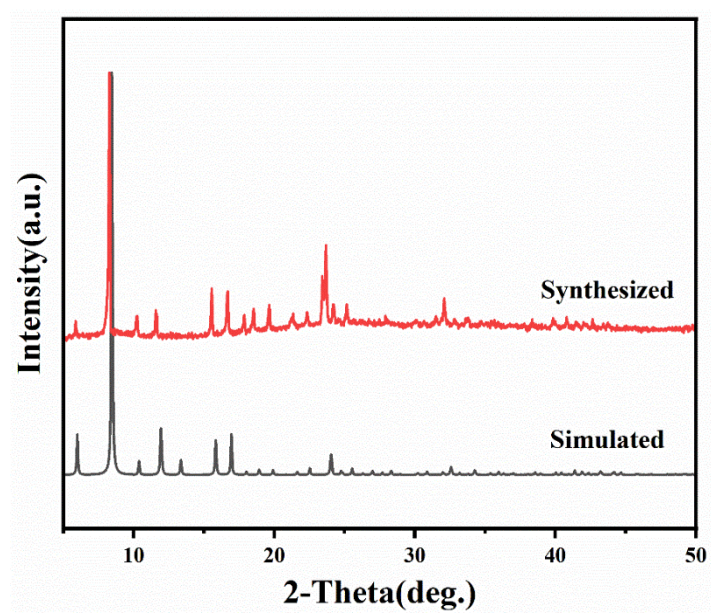

**Figure S6.** PXRD pattern of compound **1**.

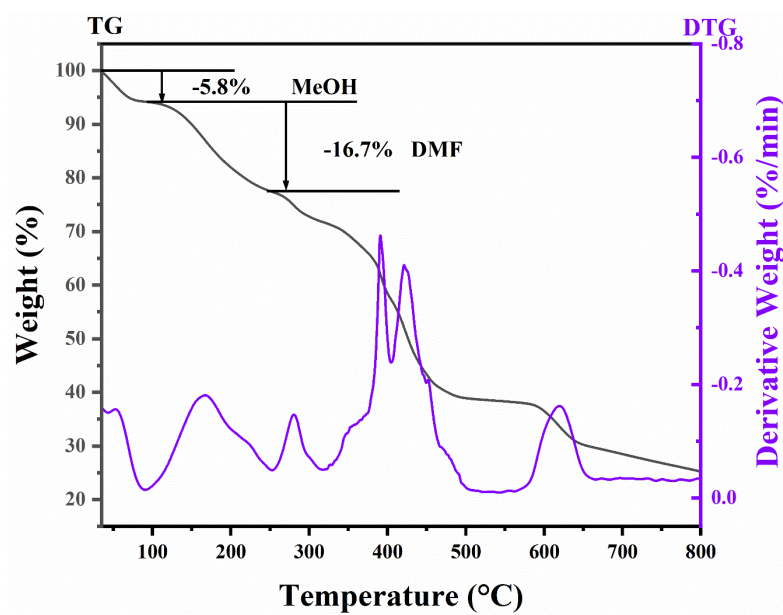

**Figure S7.** Thermogravimetric analysis of compound 1.

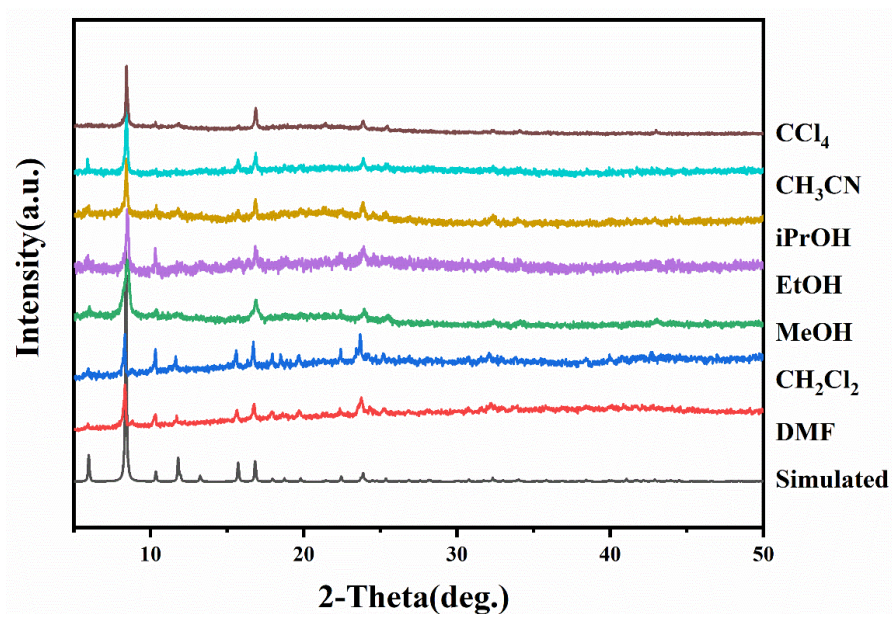

**Figure S8.** The PXRD patterns of the compound 1 after immersing in various organic solvents.

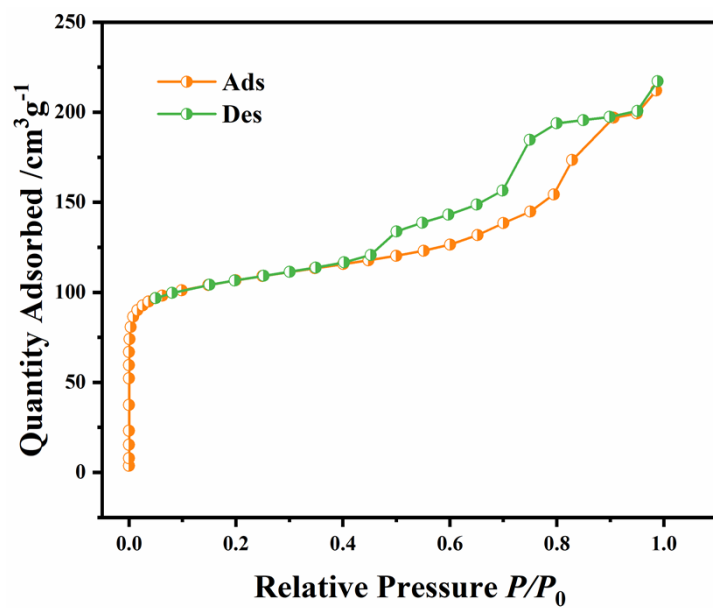

**Figure S9.** The  $N_2$  adsorption of compound **1** (77 K).

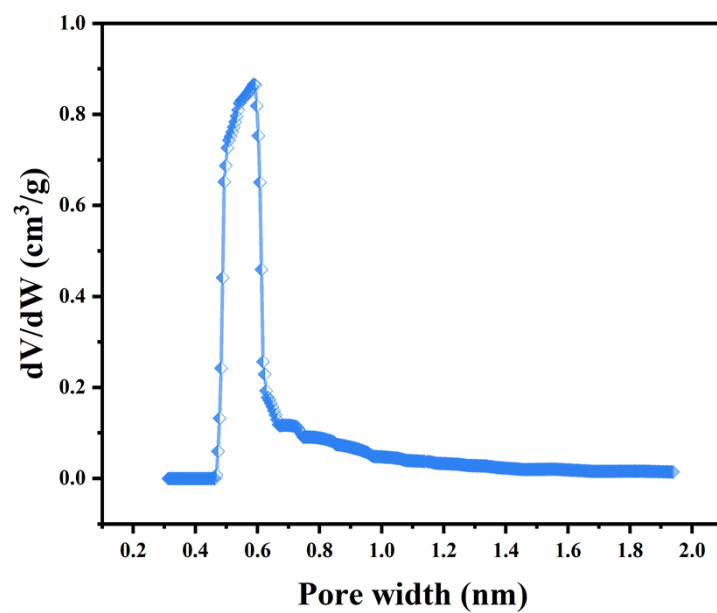

**Figure S10.** The adsorption average pore diameter of compound **1**.

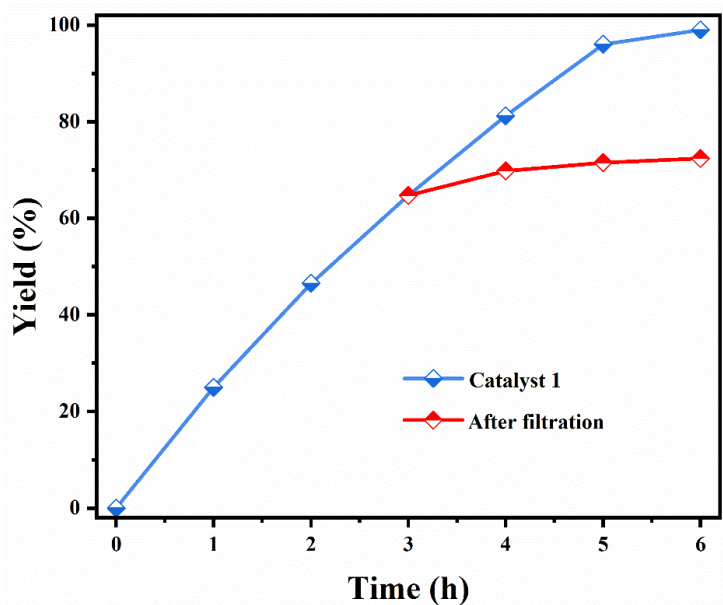

**Figure S11.** Catalyst filtration test for the cycloaddition of aziridines and CS<sub>2</sub>.

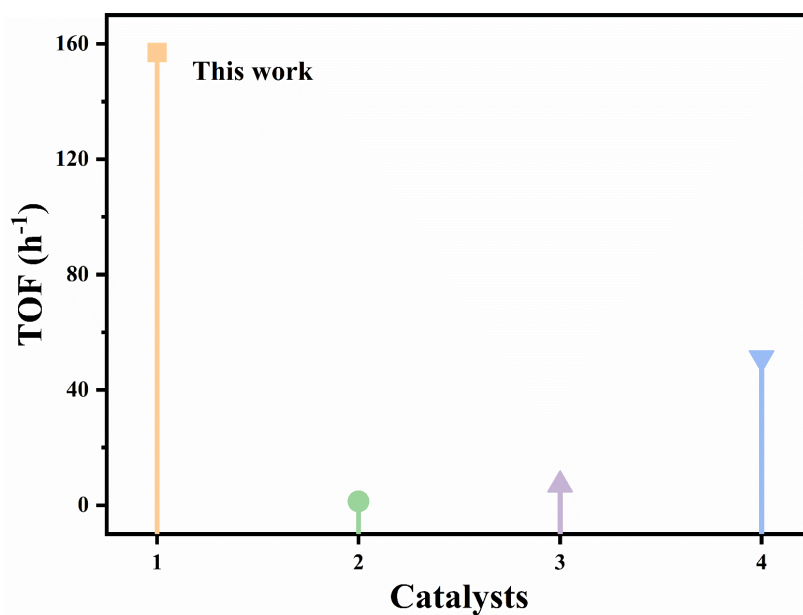

**Figure S12.** TOF values of different catalysts for the cycloaddition of CS<sub>2</sub> with 1-ethyl-2-phenylaziridine (1: compound **1** in this work; 2: {tBuC<sub>6</sub>H<sub>4</sub>CONC<sub>6</sub>H<sub>3</sub>(iPr)<sub>2</sub>Eu[N(SiMe<sub>3</sub>)<sub>2</sub>]THF}<sub>2</sub>; 3: ion-exchange resin D301R; 4: Dy<sub>24</sub>-MOF).

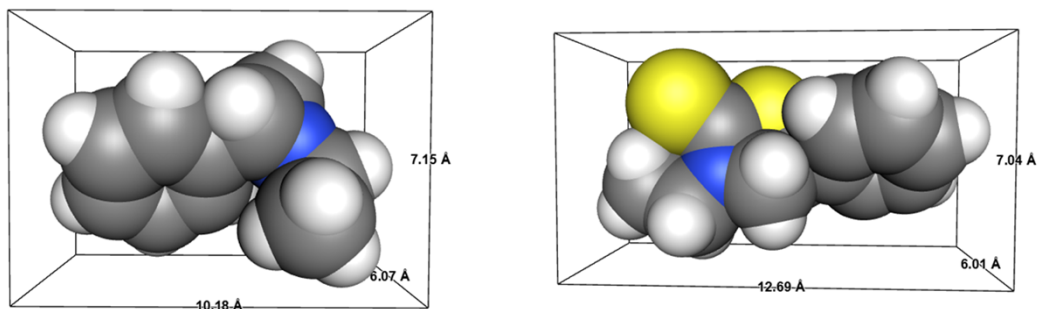

**Figure S13.** The three-dimensional size of 1-ethyl-2-phenylaziridine is  $10.2 \times 7.2 \times 6.1 \text{ \AA}^3$ , and the three-dimensional size of 3-ethyl-5-phenylthiazolidine-2-thione is  $12.7 \times 7.0 \times 6.0 \text{ \AA}^3$ .

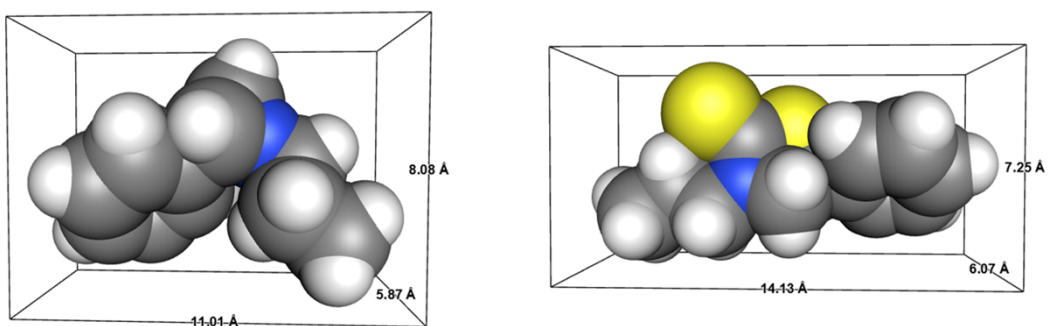

**Figure S14.** The three-dimensional size of 1-propyl-2-phenylaziridine is  $11.0 \times 8.1 \times 5.9 \text{ \AA}^3$ , and the three-dimensional size of 3-propyl-5-phenylthiazolidine-2-thione is  $14.1 \times 7.3 \times 6.1 \text{ \AA}^3$ .

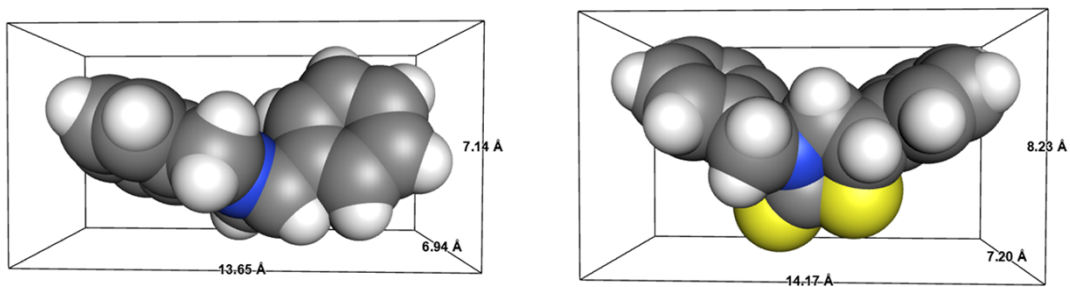

**Figure S15.** The three-dimensional size of 1-benzyl-2-phenylaziridine is  $13.7 \times 7.1 \times 7.0 \text{ \AA}^3$ , and the three-dimensional size of 3-benzyl-5-phenylthiazolidine-2-thione is  $14.2 \times 8.2 \times 7.2 \text{ \AA}^3$ .

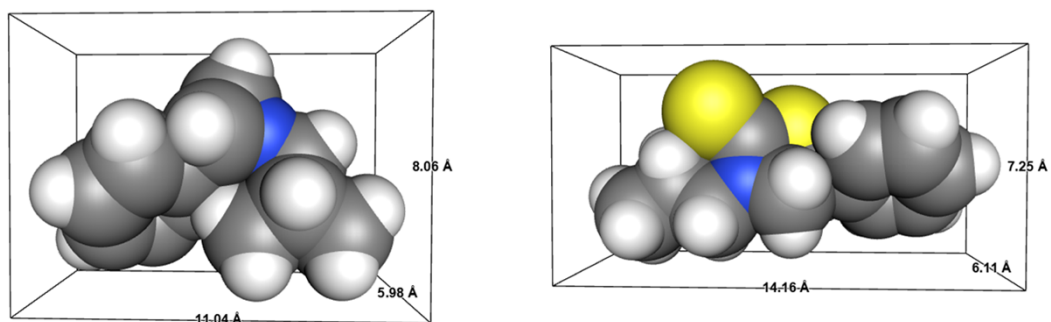

**Figure S16.** The three-dimensional size of 1-isobutyl-2-phenylaziridine is  $11.0 \times 8.1 \times 6.0 \text{ \AA}^3$ , and the three-dimensional size of 3-isobutyl-5-phenylthiazolidine-2-thione is  $14.2 \times 7.3 \times 6.1 \text{ \AA}^3$ .

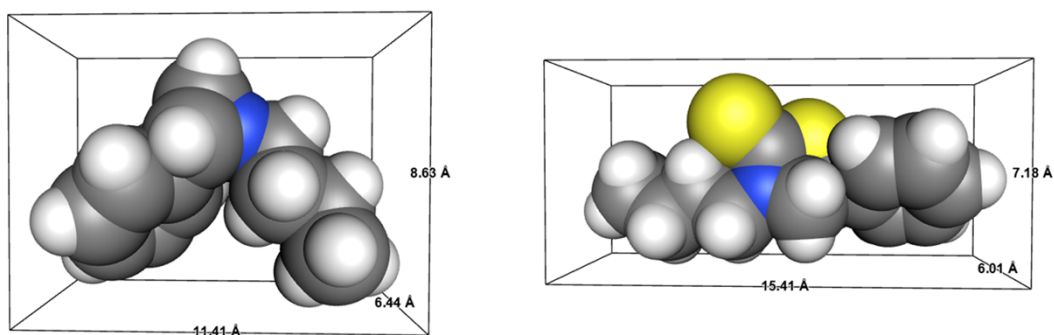

**Figure S17.** The three-dimensional size of 1-butyl-2-phenylaziridine is  $11.4 \times 8.6 \times 6.4 \text{ \AA}^3$ , and the three-dimensional size of 3-butyl-5-phenylthiazolidine-2-thione is  $15.4 \times 7.2 \times 6.0 \text{ \AA}^3$ .

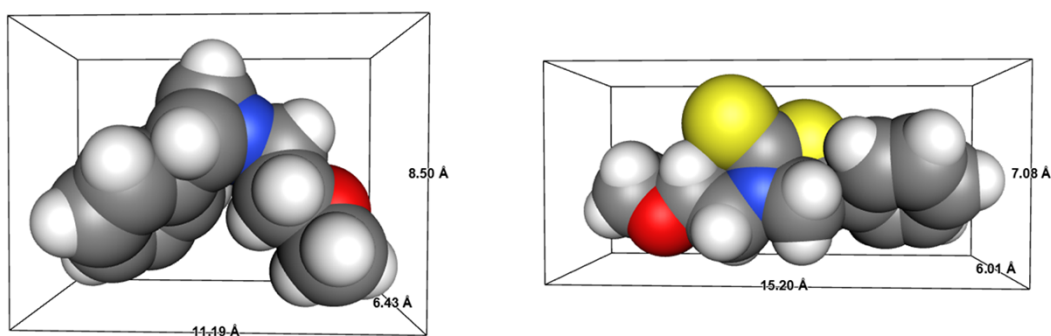

**Figure S18.** The three-dimensional size of 1-methoxyethyl-2-phenylaziridine is  $11.2 \times 8.5 \times 6.4 \text{ \AA}^3$ , and the three-dimensional size of 3-methoxyethyl-5-phenylthiazolidine-2-thione is  $15.2 \times 7.1 \times 6.0 \text{ \AA}^3$ .

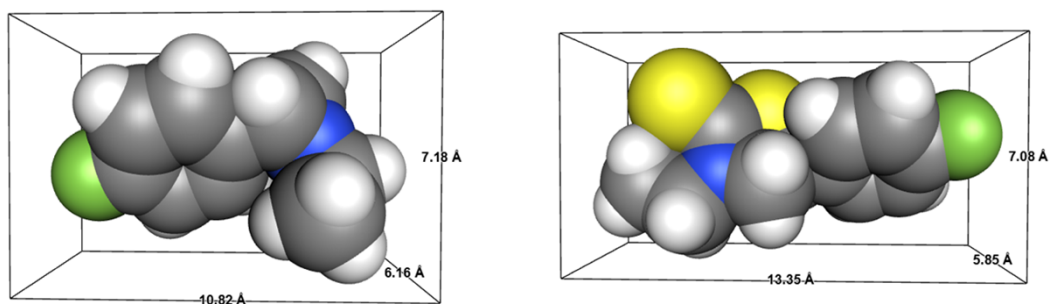

**Figure S19.** The three-dimensional size of 1-ethyl-2-(4-fluorophenyl)-aziridine is  $10.8 \times 7.2 \times 6.16 \text{ \AA}^3$ , and the three-dimensional size of 3-ethyl-5-(4-fluorophenyl)-thiazolidine-2-thione is  $13.4 \times 7.1 \times 5.9 \text{ \AA}^3$ .

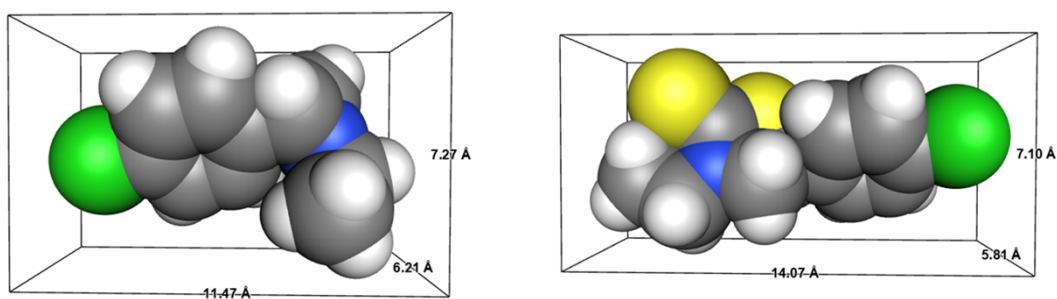

**Figure S20.** The three-dimensional size of 1-ethyl-2-(4-chlorophenyl)-aziridine is  $11.5 \times 7.3 \times 6.2 \text{ \AA}^3$ , and the three-dimensional size of 3-ethyl-5-(4-chlorophenyl)-thiazolidine-2-thione is  $14.7 \times 7.1 \times 5.8 \text{ \AA}^3$ .

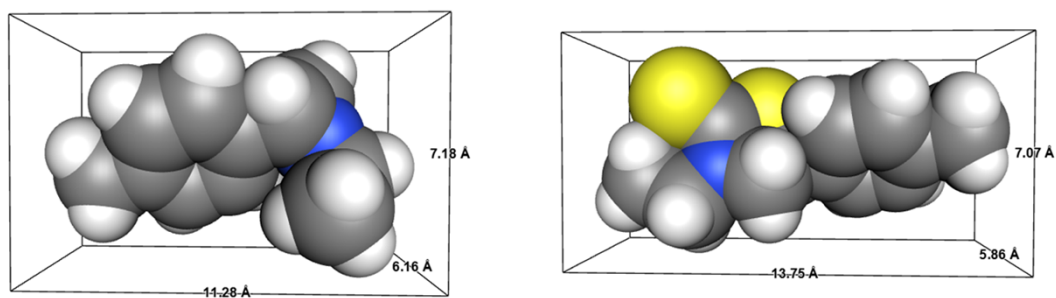

**Figure S21.** The three-dimensional size of 1-ethyl-2-(4-methyl)-aziridine is  $11.3 \times 7.2 \times 6.2 \text{ \AA}^3$ , and the three-dimensional size of 3-ethyl-5-p-tolylthiazolidine-2-thione is  $12.8 \times 7.1 \times 5.9 \text{ \AA}^3$ .



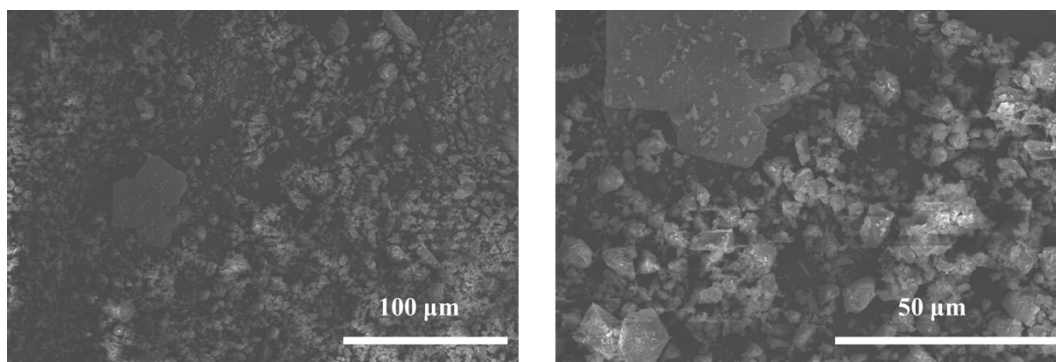

**Figure S22.** SEM images of compound **1** after 10 cycles of reaction.

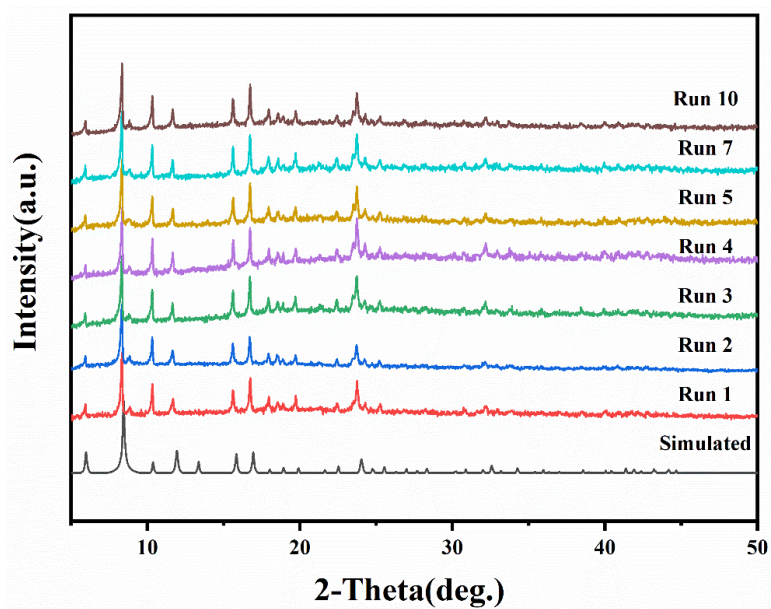

**Figure S23.** The PXRD patterns of compound **1** after recycling.

**Table S3.** The ICP result of **1** after catalytic recycling (filter liquor).

| Recycle Times        | Run 10 |
|----------------------|--------|
| Co <sup>2+</sup> (%) | 0.16   |

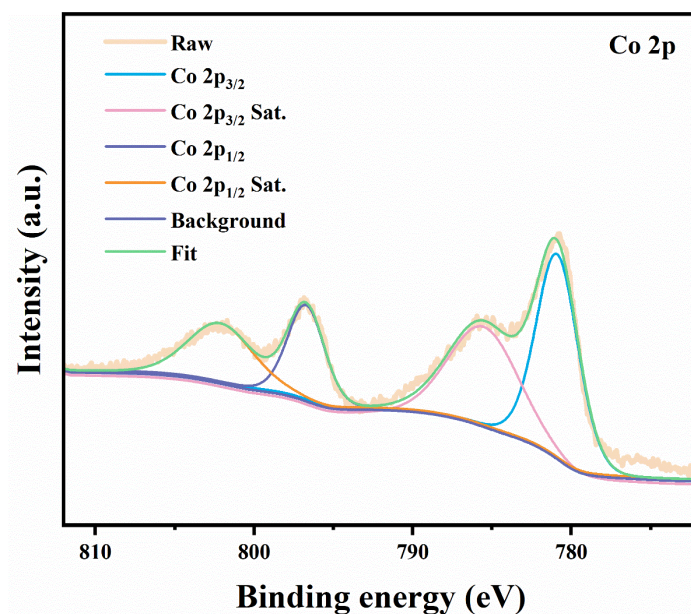

**Figure S24.** The XPS analysis of compound **1** as a catalyst for the cycloaddition reaction of CO<sub>2</sub> with 1-ethyl-2-phenylaziridine after ten catalysis recycling.

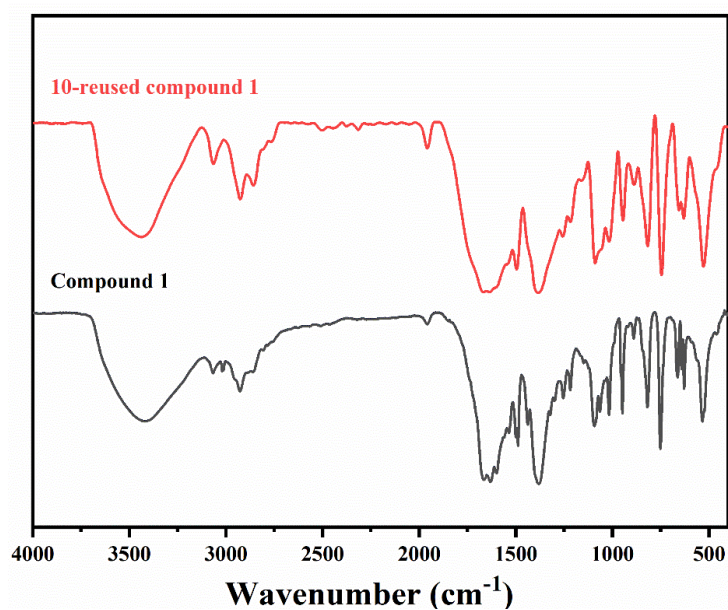

**Figure S25.** The FT-IR spectra of compound **1** and ten-times-reused **1**.

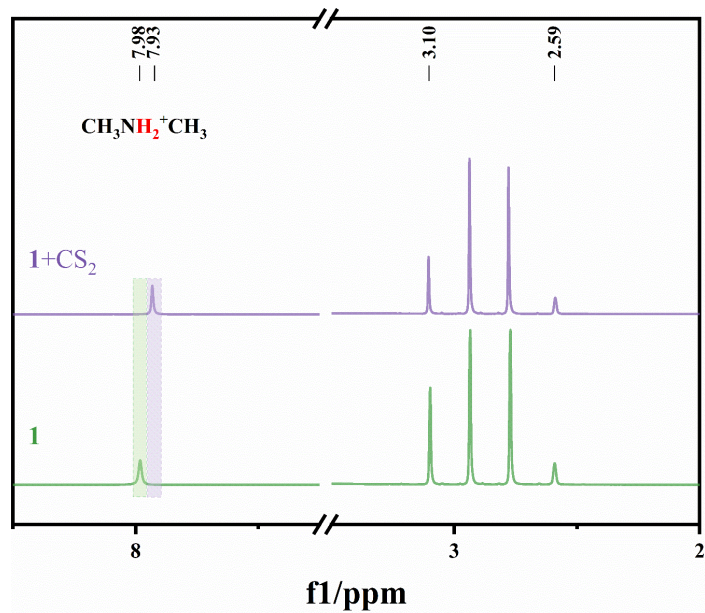

**Figure S26.** <sup>1</sup>H NMR spectroscopy of digested compound **1** in the presence or absence of CS<sub>2</sub> (H<sub>2</sub>O/DMSO = 0.1/0.55 mL).

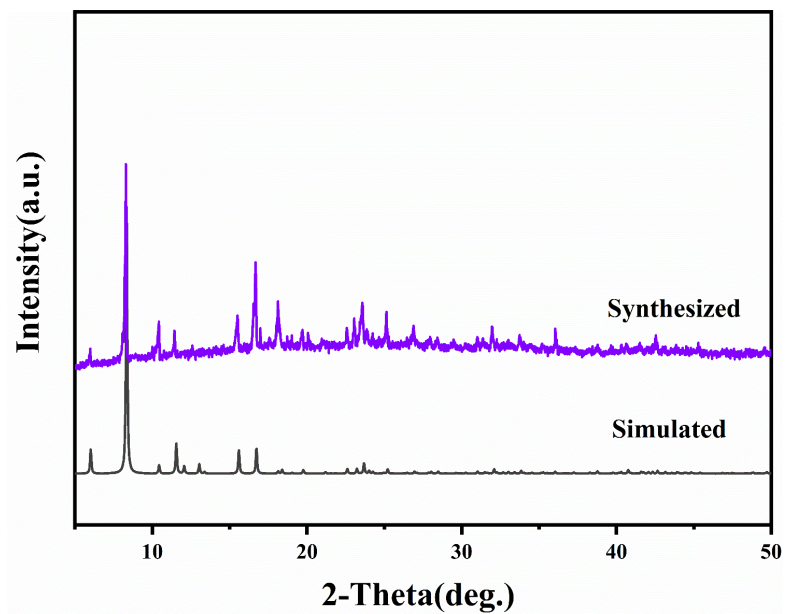

**Figure S27.** PXRD pattern of compound Co(II/III).

**Table S4.** Comparison of yields of two isomeric [Co<sub>3</sub>] cluster-based MOFs under optimized reaction conditions.

| Entry      | Yield |
|------------|-------|
| Co(II/III) | 81%   |
| compound 1 | 99%   |

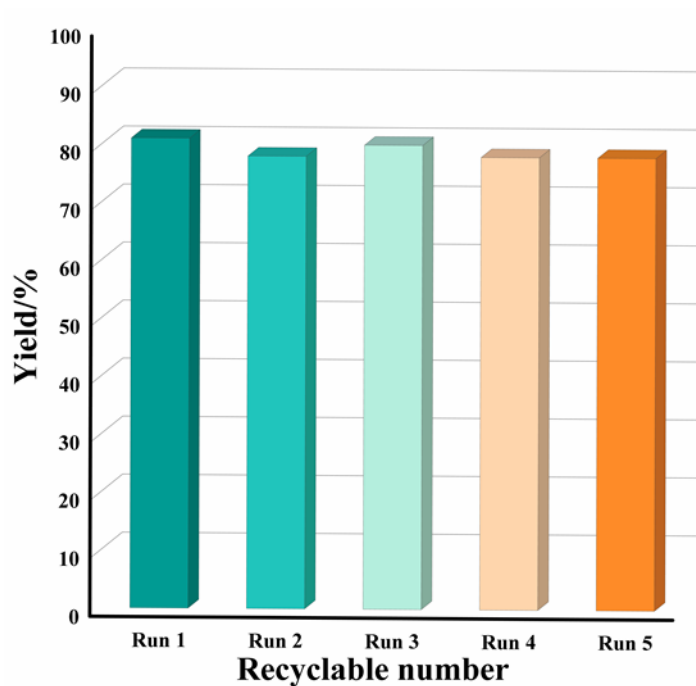

**Figure S28.** Recycling test of catalyst Co(II/III) in the CS<sub>2</sub> cycloaddition with 1-ethyl-2-phenylaziridine.

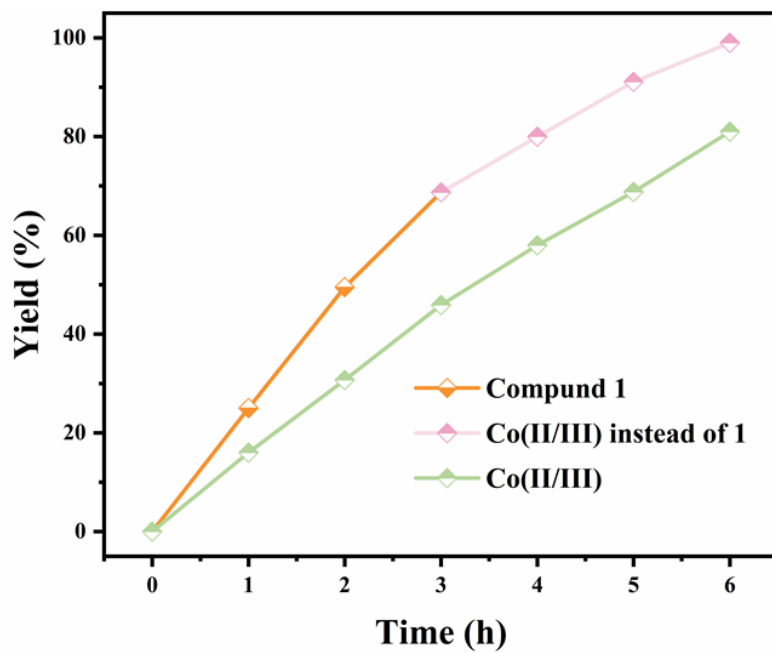

**Figure S29.** Catalyst filtration experiments of compound **1** and Co (II/III).

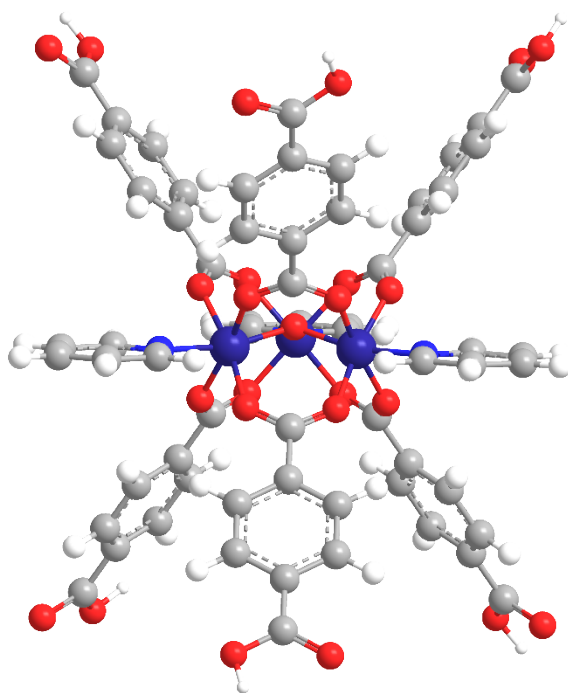

**Figure S30.** The DFT full optimized geometry of compound **1**. Color codes for atoms: bluish violet, Co; gray, C; red, O; blue, N; white, H.
